# Supplementary material
Source: PubMed Central journal article supplement (PMC7513758)
Supplement: mmc1.pdf [file mmc1.pdf]

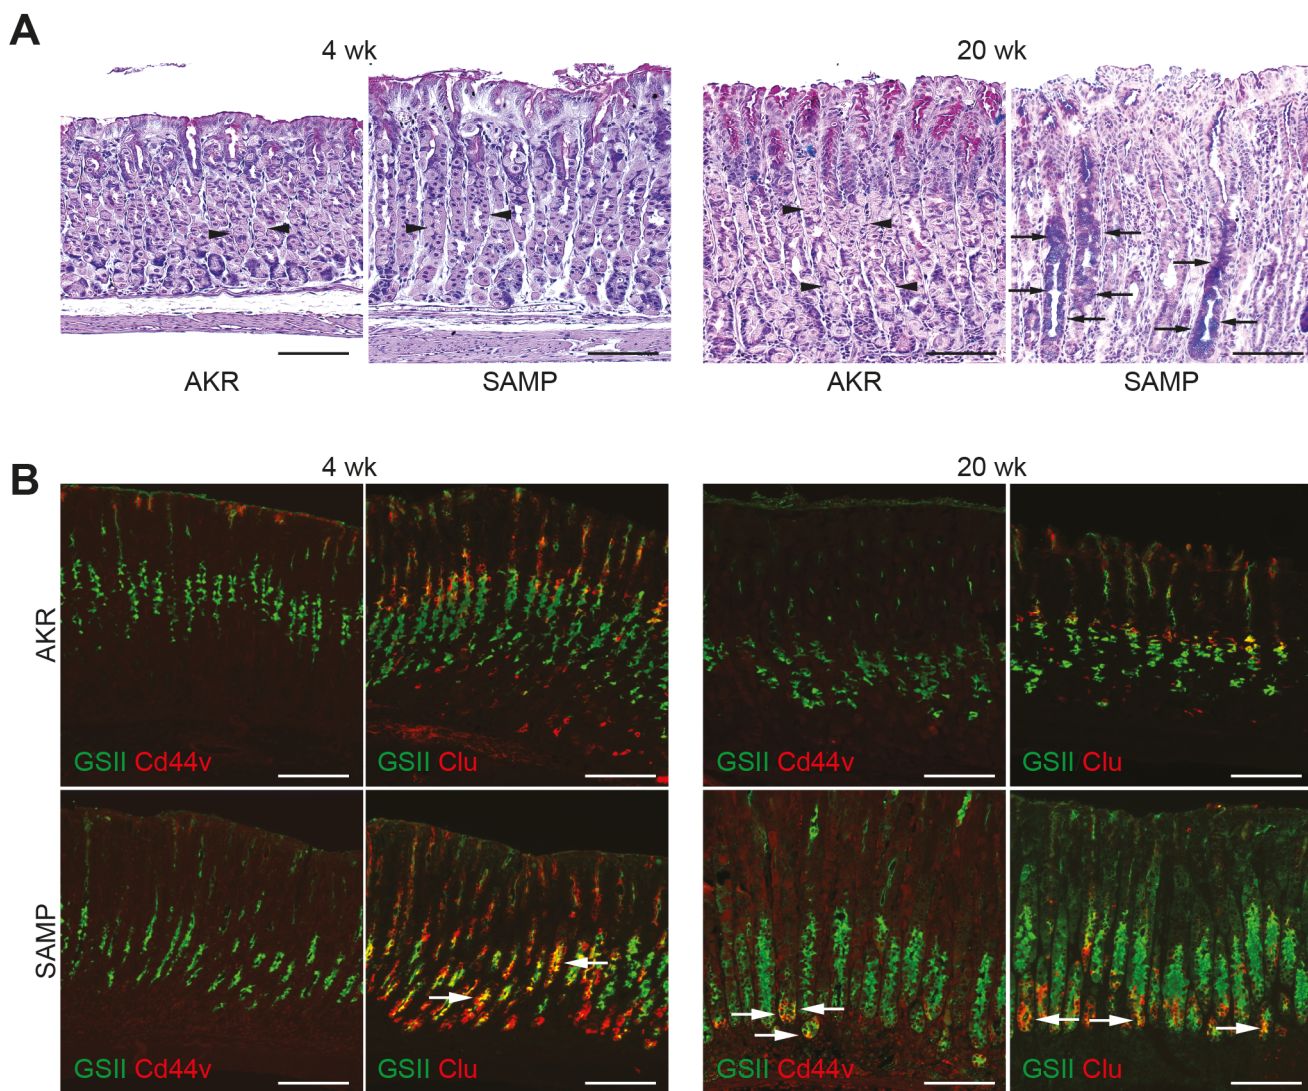

Supplemental Figure 1

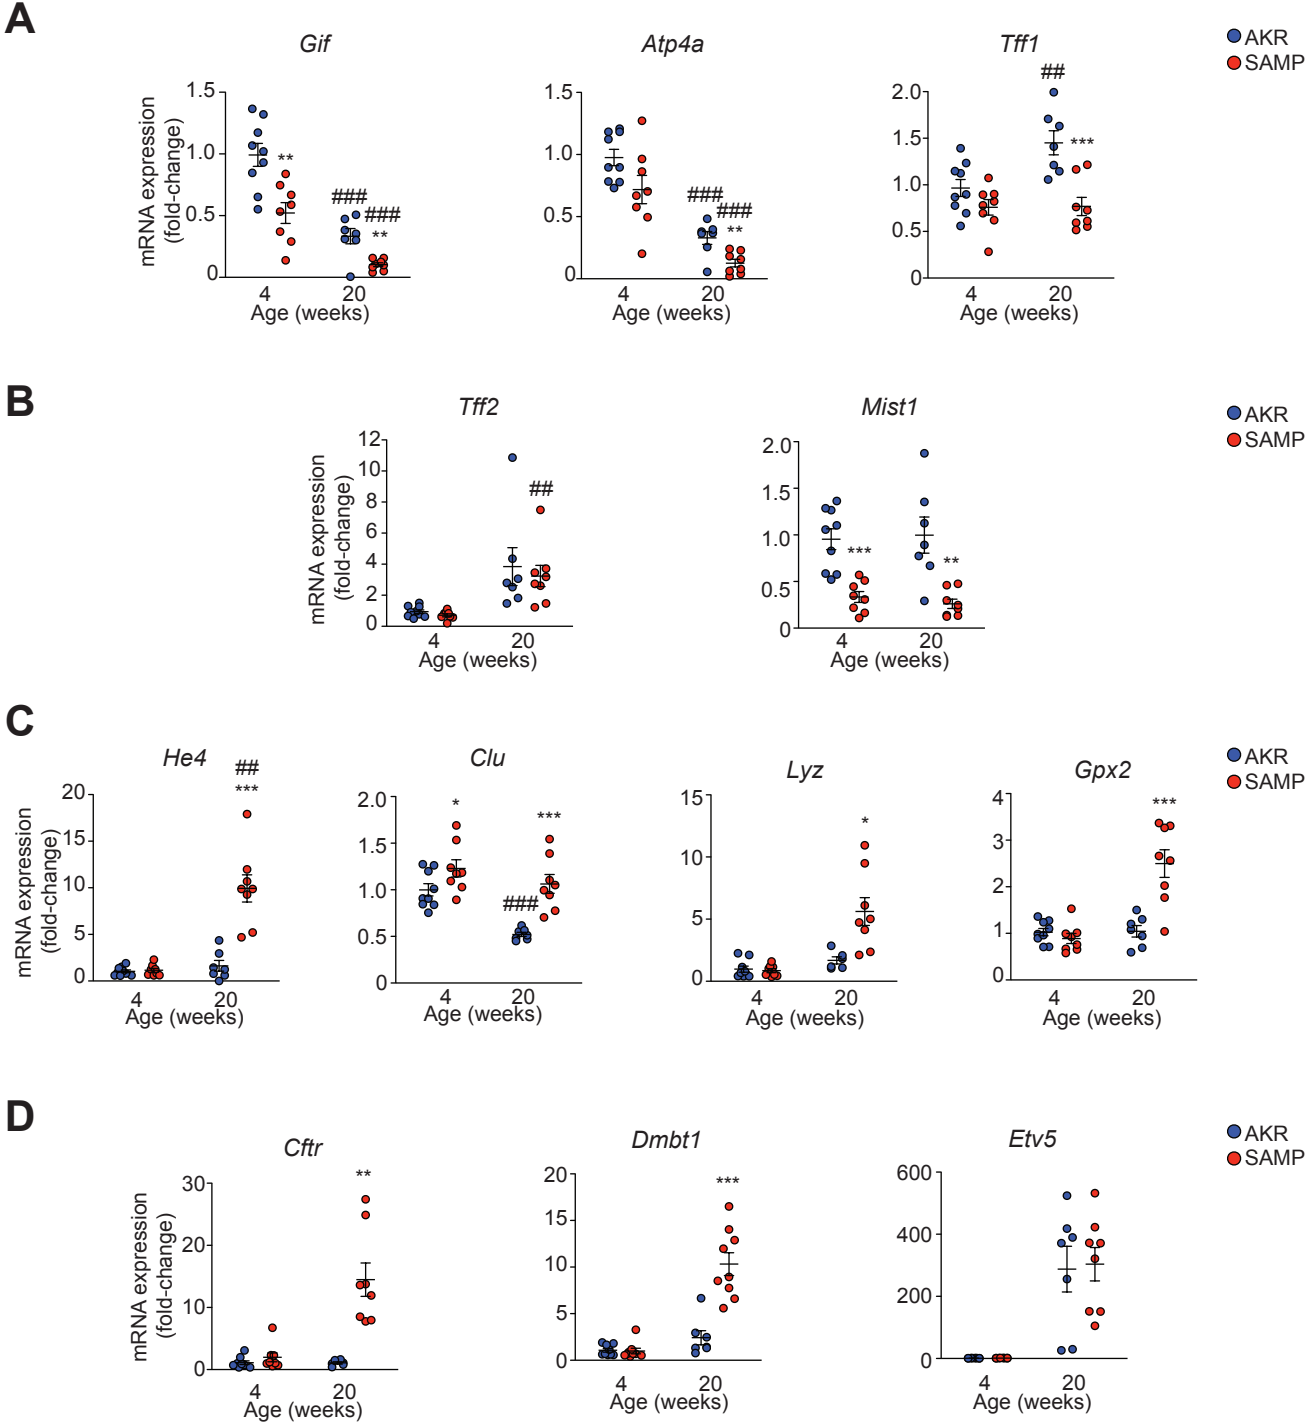

**Supplemental Figure 2**

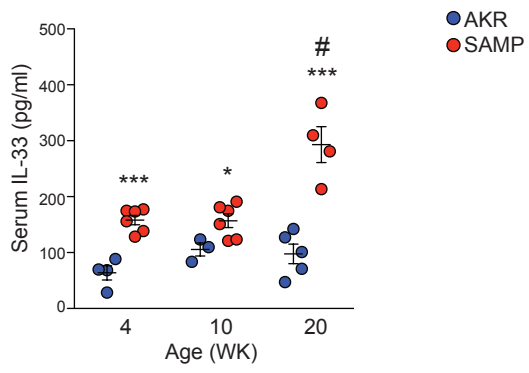

**Supplemental Figure 3**

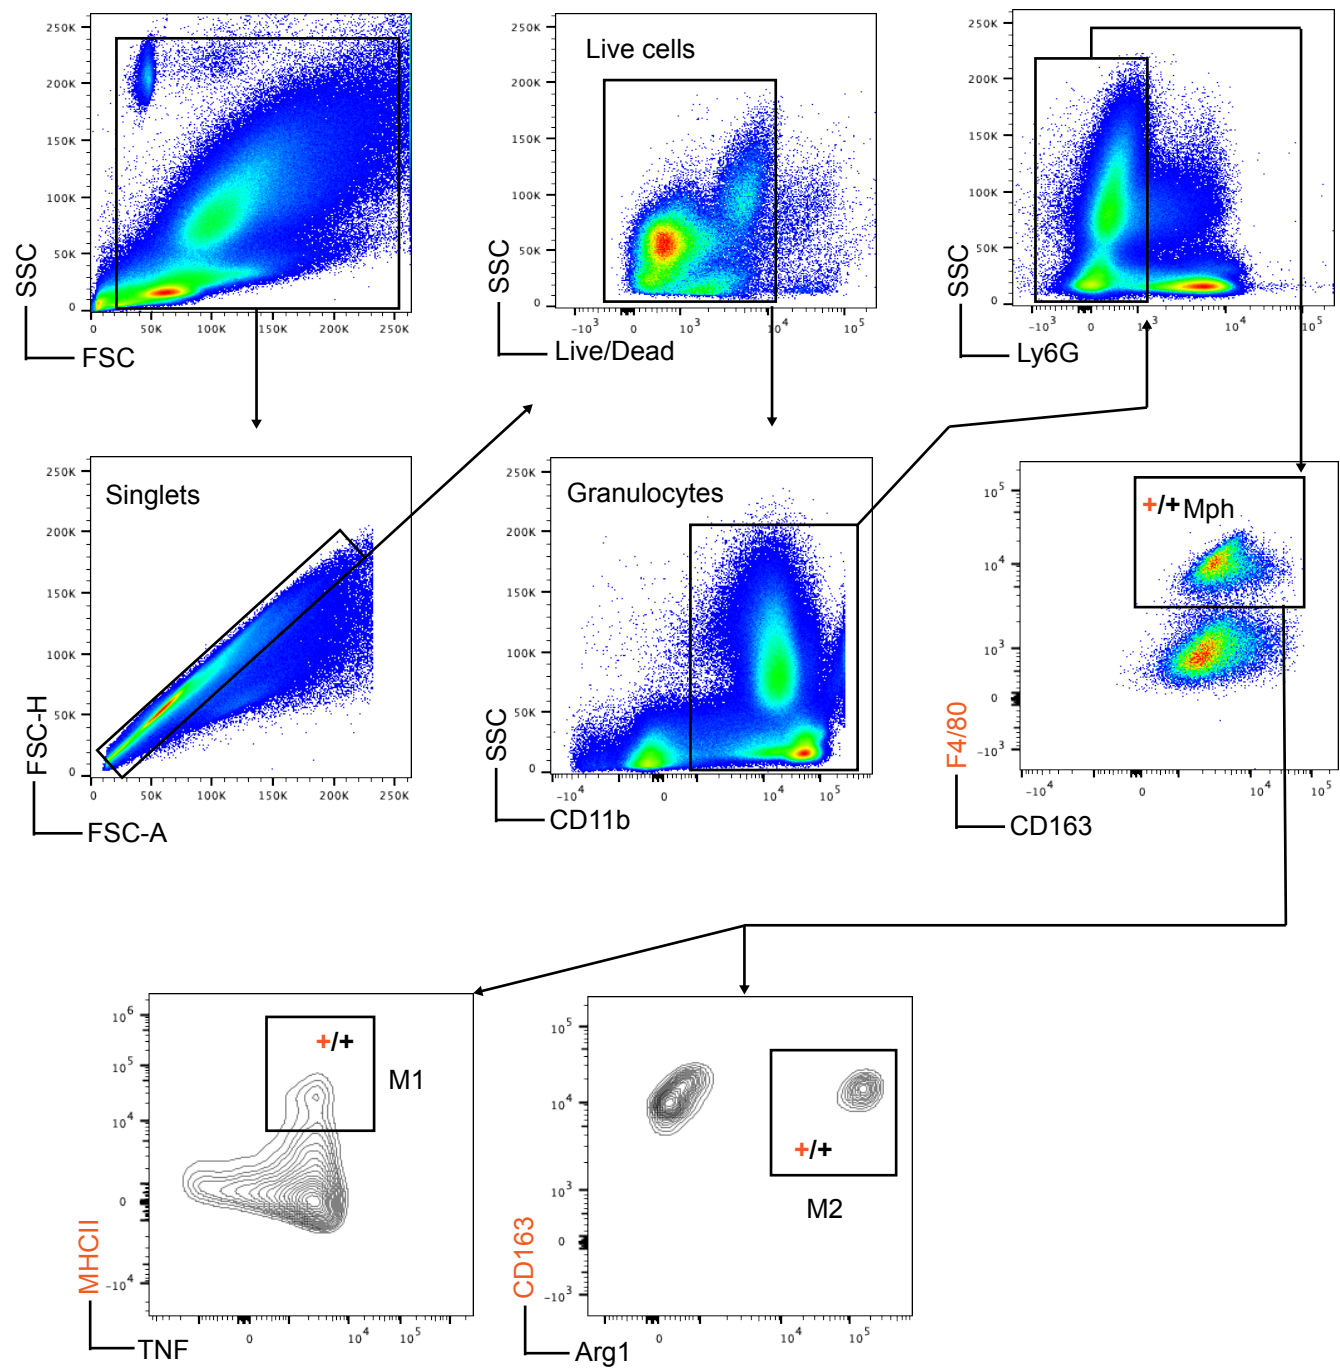

**Supplemental Figure 4**



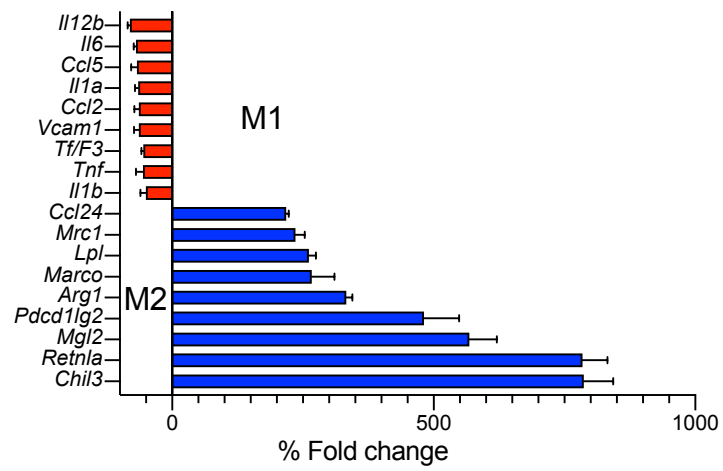

**Supplemental Figure 5**

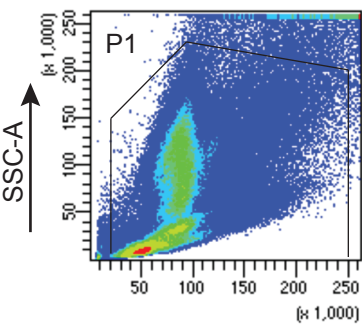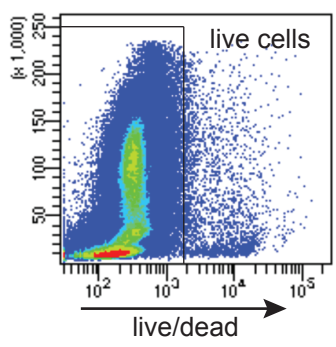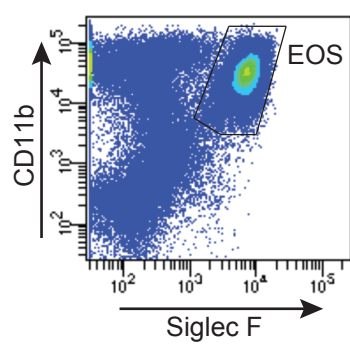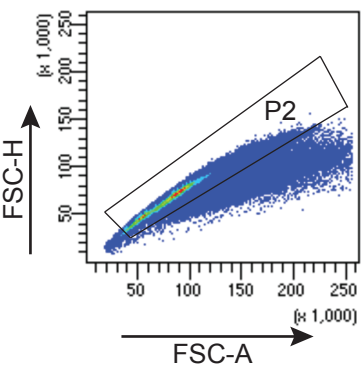

Supplemental Figure 6

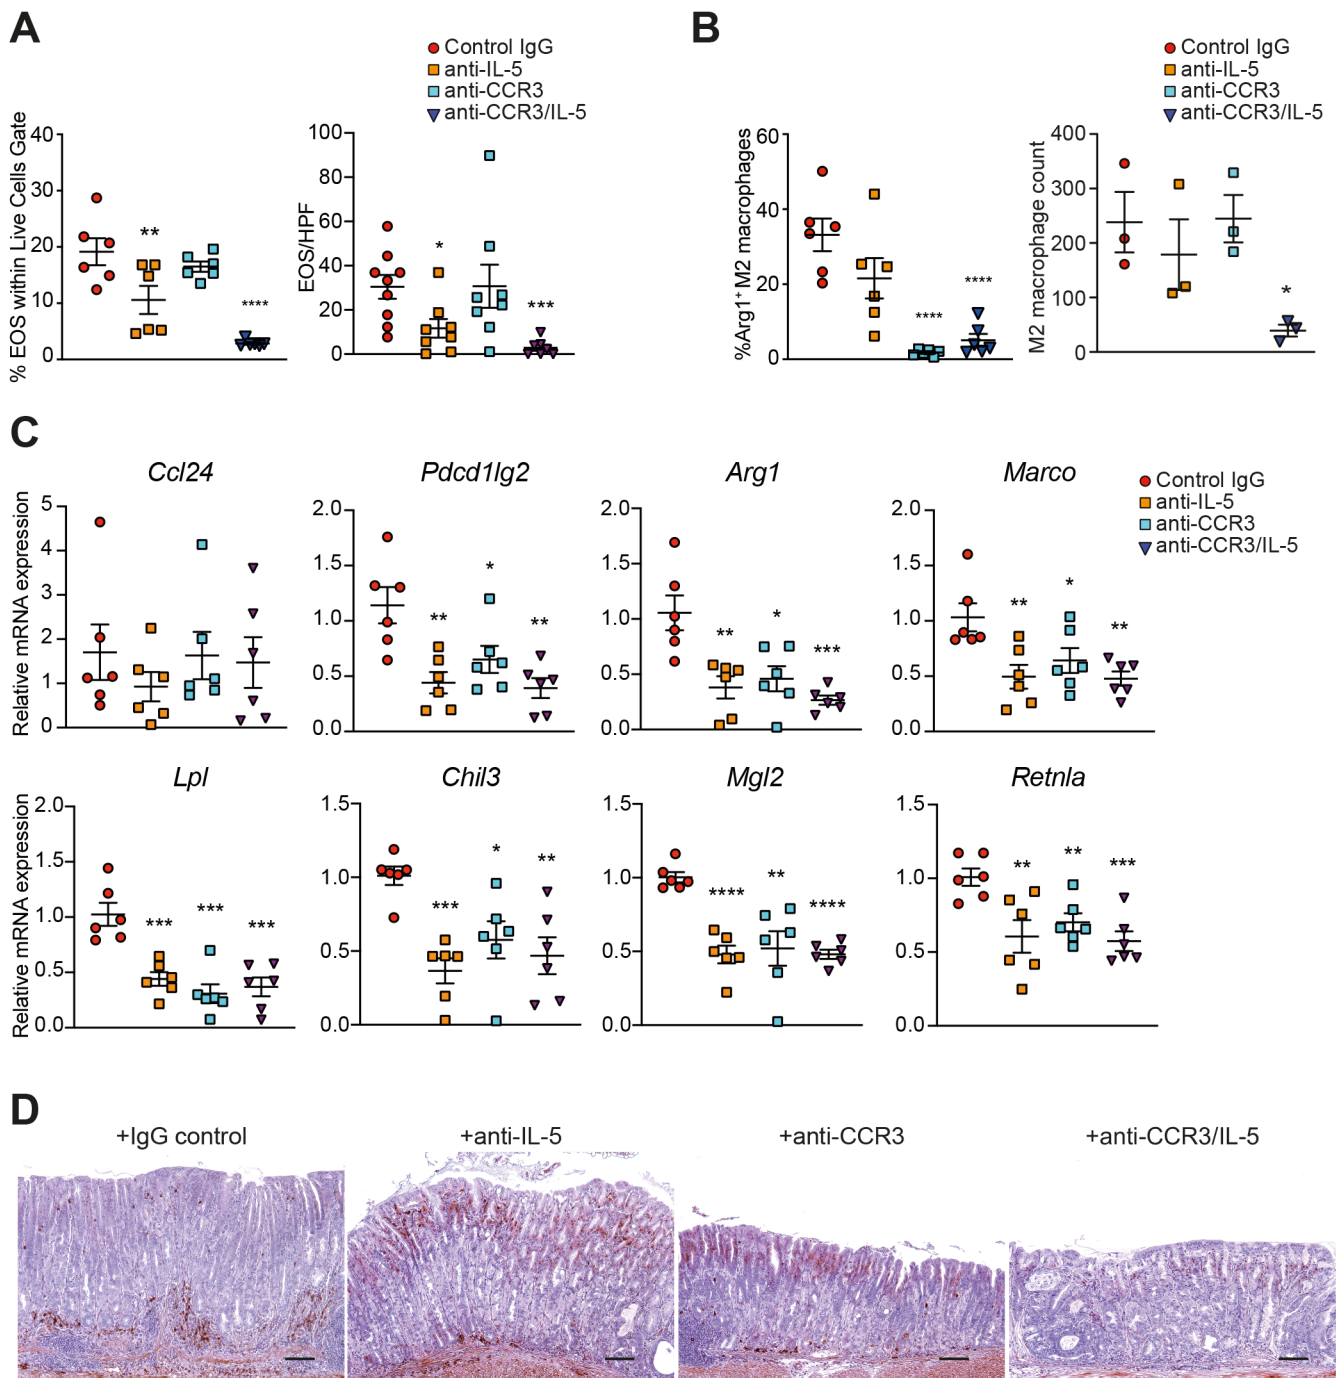

**Supplemental Figure 7**

**A**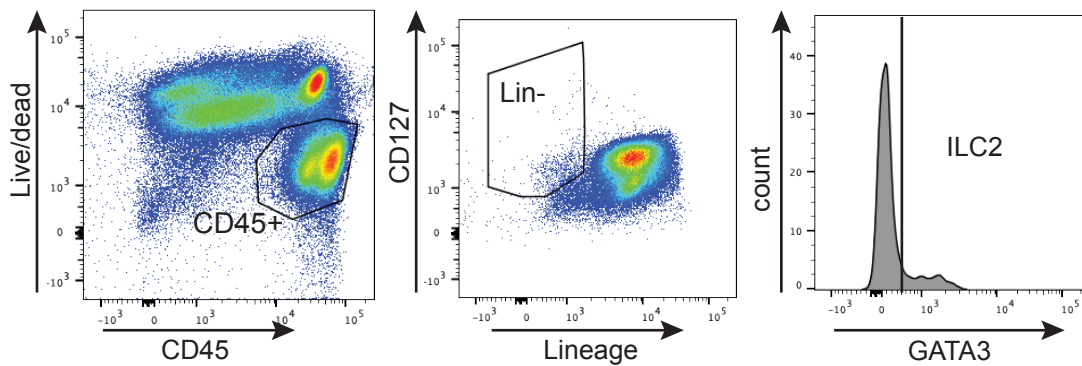**B**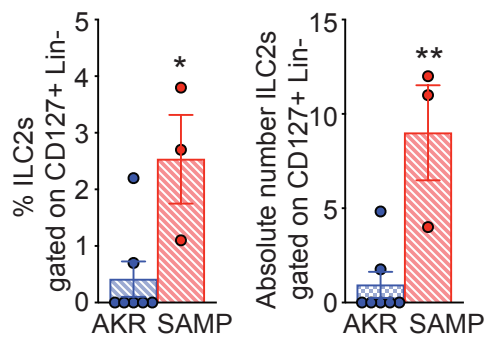**C**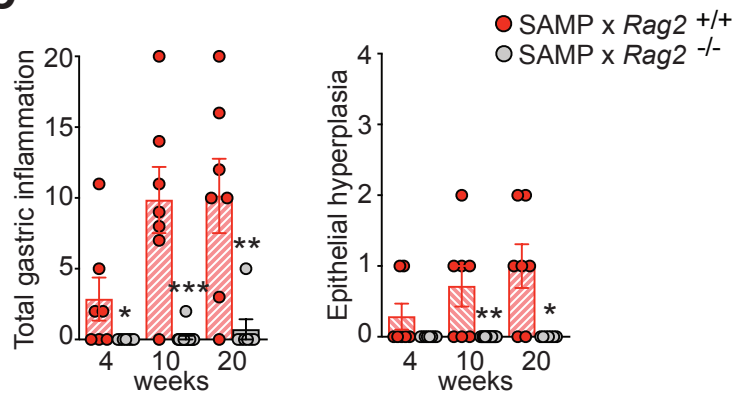

**Supplemental Figure 8**
