# Supplementary material
Source: PubMed Central journal article supplement (PMC7513758)
Supplement: mmc2.pdf [file mmc2.pdf]

**Supplemental Table 1. Primer sequences for qPCR analyses**

| <b>Target</b>       | <b>Sequence fwd</b>             | <b>Sequence rev</b>              |
|---------------------|---------------------------------|----------------------------------|
| <i>Actinb</i>       | 5'-CAGGGTGTGATGGTGGGAATG-3'     | 5'-GTAGAAGGTGTGGTGCCAGATC-3'     |
| <i>Tff1</i>         | 5'-AGCACAAAGGTGATCTGTGTCC-3'    | 5'-GGAAGCCACAATTTATCCTCTCC-3'    |
| <i>Tff2</i>         | 5'-TGCTCTGGTAGAGGGCGAG-3'       | 5'-CGACGCTAGAGTCAAAGCAG-3'       |
| <i>Mist1</i>        | 5'-TGGTGGCTAAAGCTACGTGTC-3'     | 5'-GACTGGGGTCTGTGAGGTGT-3'       |
| <i>Atp4a</i>        | 5'-TCTGCTTTGCGGGACTTGTA-3'      | 5'-CGGCATTTGAGCACAGCAT-3'        |
| <i>Lyz</i>          | 5'-GAGACCGAAGCACCGACTATG-3'     | 5'-CGGTTTTGACATTGTGTTCCG-3'      |
| <i>Gif</i>          | 5'-CCCTCTACCTCCTAAGTGTTC-3'     | 5'-CTGAGTCAGTCACCGAGTTCT-3'      |
| <i>He4</i>          | 5'-AACCAATTACGGACTGTGTGTT-3'    | 5'-TCGCTCGGTCCATTAGGCT-3'        |
| <i>Dmbt1</i>        | 5'-ACCTCCTCACGGTGCTACAG-3'      | 5'-GCTTCTTCACATCCTCCACTG-3'      |
| <i>Cftr</i>         | 5'-CTGGACCACACCAATTTTGAGG-3'    | 5'-GCGTGGATAAGCTGGGGAT-3'        |
| <i>Gpx2</i>         | 5'-CAGGGCTGTGCTGATTGAG-3'       | 5'-CGGACATACTTGAGGCTGTTCC-3'     |
| <i>Clu</i>          | 5'-CCAGCCTTTCTTTGAGATGA-3'      | 5'-CTCCTGGCACTTTTCACACT-3'       |
| <i>Etv5</i>         | 5'-GCTCTTGGTGCTAAGTAGGA-3'      | 5'-TCTGATGGGTGGGTGACA-3'         |
| <i>Il33</i>         | 5'-TCCTTGCTTGGCAGTATCCA-3'      | 5'-TGCTCAATGTGTCAACAGACG-3'      |
| <i>Il1rl1(ST2L)</i> | 5'-TGCGTACATCATTTACCCTCGGGTC-3' | 5'-TCTTGTGCCACAAGAGTGAAGTAGG-3'  |
| <i>Il1rl1(sST2)</i> | 5'-ACGCTCGACTTATCCTGTGG-3'      | 5'-CAGGTCAATTGTTGGACACG-3'       |
| <i>Ccl24</i>        | 5'-ATTCTGTGACCATCCCCTCAT-3'     | 5'-TGTATGTGCCTCTGAACCCAC-3'      |
| <i>Pdcd1lg2</i>     | 5'-TGTGCTGCCTTTTCTGTGTC-3'      | 5'-GCAGCATGGTCTGTGTCAAT-3'       |
| <i>Arg1</i>         | 5'-TTTTAGGGTTACGGCCGGTG-3'      | 5'-CCTCGAGGCTGTCCTTTTGA-3'       |
| <i>Marco</i>        | 5'-GCACTGCTGCTGATTCAAGTTC-3'    | 5'-AGTTGCTCCTGGCTGGTATG-3'       |
| <i>Lpl</i>          | 5'-GTGGCCGAGAGCGAGAAC-3'        | 5'-AAGAAGGAGTAGGTTTTATTTGTGGA-3' |
| <i>Chil3</i>        | 5'-CAGGTCTGGCAATTCTTCTGAA-3'    | 5'-GTCTTGCTCATGTGTGTAAGTGA-3'    |
| <i>Mgl2</i>         | 5'-TTAGCCAATGTGCTTAGCTGG-3'     | 5'-GGCCTCCAATTCTTGAAACCT-3'      |
| <i>Retnla</i>       | 5'-CCCTCCACTGTAACGAAGACTC-3'    | 5'-CACACCAGTAGCAGTCATCC-3'       |
| <i>Mrc1</i>         | 5'-GGACGAGCAGGTGCAGTT-3'        | 5'-CAACACATCCCGCCTTTC-3'         |
| <i>Il1a</i>         | 5'-GCACCTTACACCTACCAGAGT-3'     | 5'-AAACTTCTGCCTGACGAGCTT-3'      |
| <i>Il1b</i>         | 5'-GCAACTGTTTCTGAACTCAACT-3'    | 5'-ATCTTTTGGGGTCCGTCAACT-3'      |
| <i>Tnf</i>          | 5'-CCCTCACACTCAGATCATCTTCT-3'   | 5'-GCTACGACGTGGGCTACAG-3'        |
| <i>Vcam1</i>        | 5'-ACGTCAGAACAACCGAATCC-3'      | 5'-GTGGTGCTGTGACAATGACC-3'       |
| <i>Il12b</i>        | 5'-TGGTTTGCCATCGTTTTGCTG-3'     | 5'-ACAGGTGAGGTTCACTGTTTCT-3'     |
| <i>Il6</i>          | 5'-TAGTCCTTCTACCCCAATTTCC-3'    | 5'-TTGGTCCTTAGCCACTCCTTC-3'      |
| <i>Ccl5</i>         | 5'-GCTGCTTTGCCTACCTCTCC-3'      | 5'-TCGAGTGACAAACACGACTGC-3'      |
| <i>Ccl2</i>         | 5'-TTAAAAACCTGGATCGGAACCAA-3'   | 5'-GCATTAGCTTCAGATTTACGGGT-3'    |
| <i>Tf/F3</i>        | 5'-CCGAGCAATGGAAGAGTTTC-3'      | 5'-CGCTTGACAGAGATATGGA-3'        |
| <i>36B4</i>         | 5'-GCTCCAAGCAGATGCAGCA-3'       | 5'-CCGGATGTGAGGCAGCAG-3'         |

**Supplemental Table 2.** *Antibodies utilized for flow cytometry*

| <b>Antigen</b> | <b>Label</b> | <b>Catalog #</b> | <b>Source</b>                   |
|----------------|--------------|------------------|---------------------------------|
| CD11c          | PECy7        | 561241           | BD Biosciences,<br>San Jose, CA |
| CD11b          | PE-CF594     | 562287           | BD Biosciences                  |
| F4/80          | Alexa-488    | 564227           | BD Biosciences                  |
| Ly6G           | BUV396       | 563978           | BD Biosciences                  |
| Siglec F       | BV610        | 740280           | BD Biosciences                  |
| MHCII          | BV711        | 563414           | BD Biosciences                  |
| Arginase 1     | APC          | 17-3697-82       | ThermoFisher, Waltham, MA       |
| TNF            | BV650        | 563943           | BD Biosciences                  |
| CD163          | BV421        | 155309           | Biolegend, San Diego, CA        |
| IL33           | PE           | MA5-23640        | ThermoFisher                    |
